# Supplementary material for: Time delays in treatment of snakebite patients in rural Sri Lanka and the need for rapid diagnostic tests
Source: PubMed Central journal article supplement (PMC7728389; doi:10.1371/journal.pntd.0008914), 2020-11-30
Supplement: pntd.0008914.s003.pdf [file pntd.0008914.s003.pdf]

## Anuradhapura Snakebite Cohort - data collection sheet

**Study ID of the pt:**

*(Tick "✓" the appropriate space only if the data present)*

|                                                                                                                                                                                                                                                                                                                                                                                                                                                                                                                                                                                   |                                                                                                                    |                      |
|-----------------------------------------------------------------------------------------------------------------------------------------------------------------------------------------------------------------------------------------------------------------------------------------------------------------------------------------------------------------------------------------------------------------------------------------------------------------------------------------------------------------------------------------------------------------------------------|--------------------------------------------------------------------------------------------------------------------|----------------------|
| <p>1. Patient's Name :</p> <p>5. Address:</p> <p>6. Occupation:</p> <p>7. GS Division:</p> <p>9. Contact no (if any): (a) , (b) , (c)</p> <p>10. Highest educational level: &lt; O/L ( ) O/L ( ) A/L ( ) HE ( )</p> <p>11. Involvement in farming: Full time ( ) Part time ( ) No inv ( )</p> <p>12. Number of dependents:</p>                                                                                                                                                                                                                                                    | <p>2. BHT:</p> <p>3. Age:</p> <p>4. Sex:</p> <p>13. Weight:: kg</p> <p>14. Height: m</p> <p>8. Div. Secretary:</p> | <b>A</b>             |
| <p>1. Date:</p> <p>4. Activity:</p> <p>6. Transport to primary care: Mode:</p> <p>8. Snake seen : yes ( ) no ( )</p> <p>10. Intentional delays for treatment seeking: yes ( ) no ( )</p> <p>12. Reasons: a. Native treatment: ( ) c. snake capturing ( )</p>                                                                                                                                                                                                                                                                                                                      |                                                                                                                    | <b>B</b>             |
| <p>2. Time: AM/PM</p> <p>5. Alcohol influence: ( )</p> <p>7. Distance: km</p> <p>9. Delay in finding transport: mins</p> <p>11. duration: mins</p> <p>b. Waited for symptoms: ( )</p> <p>d. Waited for someone to accompany to hospital ( )</p>                                                                                                                                                                                                                                                                                                                                   |                                                                                                                    | <b>Snake bite</b>    |
| <p>1. Patient sure of the snakebite : Yes ( ) No ( )</p> <p>Write the complaint in his own words (sinhala)</p> <p>3. Fang marks: 1 ( ) 2 ( ) 3 ( ) 4 ( ) several marks in U shape ( )</p> <p>4. Provoked bite ( )</p> <p>5: Snake was seen while bite occur: ( ) 6: ID by patient:</p> <p>7: Specimen brought to hospital ( ) 8. Available on admission to THA ( )</p> <p>9. Snake ID by MO/ CRA: 10. Snake ID by AS:</p> <p>11. EIA diagnosis:</p>                                                                                                                               | <p>2. Site of bite: <i>(draw, indicating fang marks)</i></p>                                                       | <b>C</b>             |
| <p>1. Tourniquet : Yes ( ) No ( ) 2. Pressure bandage: Yes ( ) No ( )</p> <p>3. Time since bite when applied: min 4. Width: cm 5. Applied duration: min</p> <p>6. Ca(OH)<sub>2</sub>: ( ) 7. Incision: ( ) 8. Lemon: ( ) 9. Smashed onion: ( )</p> <p>10: Oral sucking : ( ) 11. Washing of bite site ( ) 12. Soap: ( ) 13: Splinting ( )</p> <p>14: Paracetamol ( ) 15. Other pain relievers (specify) :</p> <p>16: Native/ Ayurveda treatment : Yes ( ) No: ( ) 17: herbal decoctions (nasna): ( )</p> <p>18. Snake stone ( ) 19. Other interventions of native/ Ayurveda :</p> |                                                                                                                    | <b>D</b>             |
| <p>6. Ca(OH)<sub>2</sub>: ( ) 7. Incision: ( ) 8. Lemon: ( ) 9. Smashed onion: ( )</p> <p>10: Oral sucking : ( ) 11. Washing of bite site ( ) 12. Soap: ( ) 13: Splinting ( )</p> <p>14: Paracetamol ( ) 15. Other pain relievers (specify) :</p> <p>16: Native/ Ayurveda treatment : Yes ( ) No: ( ) 17: herbal decoctions (nasna): ( )</p> <p>18. Snake stone ( ) 19. Other interventions of native/ Ayurveda :</p>                                                                                                                                                             |                                                                                                                    | <b>Pre-admission</b> |
| <p>1. Admission type: Direct: ( ) Transferred ( )</p> <p>2. Primary care: a. DOA: b. TOA: am/pm c. Reason for Tx:</p> <p>3. Secondary care: a. DOA: b. TOA: am/pm c. Reason for Tx:</p> <p>4. TH Anuradhapura a. DOA: b. TOA: am/pm</p>                                                                                                                                                                                                                                                                                                                                           |                                                                                                                    | <b>E</b>             |
| <p>1. Blood samples: Admission ( ), T1 ( ), T4 ( ), T8 ( ), T12 ( ), T24 ( ), T48 ( )</p> <p>T72 ( ), T96 ( ), T120 ( )</p> <p>2. sfEMG</p>                                                                                                                                                                                                                                                                                                                                                                                                                                       |                                                                                                                    | <b>Samples</b>       |
| <p>1. Admission type: Direct: ( ) Transferred ( )</p> <p>2. Primary care: a. DOA: b. TOA: am/pm c. Reason for Tx:</p> <p>3. Secondary care: a. DOA: b. TOA: am/pm c. Reason for Tx:</p> <p>4. TH Anuradhapura a. DOA: b. TOA: am/pm</p>                                                                                                                                                                                                                                                                                                                                           |                                                                                                                    | <b>Hospitals</b>     |

|                               |                    |                     |                                |                             |
|-------------------------------|--------------------|---------------------|--------------------------------|-----------------------------|
| 1. Diabetes Mellitus ( )      | 2. CKD ( )         | 3. Hypertension ( ) | 4. Alcoholic liver disease ( ) | <b>F</b><br><b>Past Med</b> |
| 4. Snakebite ( )              | a. species:        | b. Year:            | c. Hospitalized days:          |                             |
| 5. Agrochemical poisoning ( ) | a. species:        | b. Year:            | c. Hospitalized days:          |                             |
| 6. Seizure disorders ( )      | 7. Other (specify) |                     |                                |                             |

**H: Investigations**

|                     | Dt | tm | Result | Dt | tm | Result | Dt | tm | Result | Dt | tm | Result |
|---------------------|----|----|--------|----|----|--------|----|----|--------|----|----|--------|
| 1. RBC              |    |    |        |    |    |        |    |    |        |    |    |        |
| 2. WBC              |    |    |        |    |    |        |    |    |        |    |    |        |
| 3. Platelets        |    |    |        |    |    |        |    |    |        |    |    |        |
| 4. Hb               |    |    |        |    |    |        |    |    |        |    |    |        |
| 5. WBCT20           |    |    |        |    |    |        |    |    |        |    |    |        |
| 6. CT (lab)         |    |    |        |    |    |        |    |    |        |    |    |        |
| 7. PT               |    |    |        |    |    |        |    |    |        |    |    |        |
| 8. INR              |    |    |        |    |    |        |    |    |        |    |    |        |
| 9. APTT             |    |    |        |    |    |        |    |    |        |    |    |        |
| 10. U RBC           |    |    |        |    |    |        |    |    |        |    |    |        |
| 11. U Prtn          |    |    |        |    |    |        |    |    |        |    |    |        |
| 12. Sr Crtn         |    |    |        |    |    |        |    |    |        |    |    |        |
| 13. BUN             |    |    |        |    |    |        |    |    |        |    |    |        |
| 14. SGPT            |    |    |        |    |    |        |    |    |        |    |    |        |
| 15. SGOT            |    |    |        |    |    |        |    |    |        |    |    |        |
| 16. pH              |    |    |        |    |    |        |    |    |        |    |    |        |
| 17. Na <sup>+</sup> |    |    |        |    |    |        |    |    |        |    |    |        |
| 18. K <sup>+</sup>  |    |    |        |    |    |        |    |    |        |    |    |        |
| 19. CPK             |    |    |        |    |    |        |    |    |        |    |    |        |
|                     |    |    |        |    |    |        |    |    |        |    |    |        |
|                     |    |    |        |    |    |        |    |    |        |    |    |        |
|                     |    |    |        |    |    |        |    |    |        |    |    |        |

19. ECG/USS abd/Blood picture



| I. AVS |             |               |              |               |                |                                      |     |     |
|--------|-------------|---------------|--------------|---------------|----------------|--------------------------------------|-----|-----|
| Cycle  | No of vials | Infusion rate | Time started | Time finished | Brand and Bt/N | Pre med ( <i>indicate the dose</i> ) |     |     |
| 1      |             |               |              |               | B / V          | Adr                                  | HCZ | CPM |
| 2      |             |               |              |               | B / V          | Adr                                  | HCZ | CPM |
| 3      |             |               |              |               | B / V          | Adr                                  | HCZ | CPM |
| 4      |             |               |              |               | B / V          | Adr                                  | HCZ | CPM |

| J: Adverse reactions |       |                |                    |                       |            |        |        |                 |
|----------------------|-------|----------------|--------------------|-----------------------|------------|--------|--------|-----------------|
|                      | Cycle | Brown grading* | Time of appearance | Time of disappearance | Adrenaline | IV HCZ | IV CPM | Other (specify) |
| 1                    | 1     |                |                    |                       |            |        |        |                 |
| 2                    | 2     |                |                    |                       |            |        |        |                 |
| 3                    | 3     |                |                    |                       |            |        |        |                 |
| 4                    | 4     |                |                    |                       |            |        |        |                 |

\*Brown grading:

**Grade 1** (mild: **skin and subcutaneous tissue only**) : Generalized erythema, urticaria, periorbital oedema or angioedema

**Grade 2** (moderate: features suggestive of **respiratory, CVS or GI involvement**): Dyspnoea, stridor, wheeze, nausea, vomiting, dizziness, diaphoresis chest or throat tightness, abdominal pain.

**Grade 3** (Severe: hypoxia, hypotension or neurologic compromise): Cyanosis or SpO<sub>2</sub> =<92% any stage, SBP <90mmHg, confusion, collapse, LOC, incontinence.

| K. Other Management             |              |              |                     |                         |              |                |  |  |  |
|---------------------------------|--------------|--------------|---------------------|-------------------------|--------------|----------------|--|--|--|
| <b>Empirical Antibiotics</b>    |              |              |                     |                         |              |                |  |  |  |
|                                 | <b>Day 1</b> | <b>Day 2</b> | <b>Day 3</b>        | <b>Day 4</b>            | <b>Day 5</b> | <b>Day 6</b>   |  |  |  |
| <b>IV crystalloids</b>          |              |              |                     |                         |              |                |  |  |  |
| <b>Oral</b>                     |              |              |                     |                         |              |                |  |  |  |
| <b>Cryoprecipitate</b>          |              |              |                     |                         |              |                |  |  |  |
| <b>FFP</b>                      |              |              |                     |                         |              |                |  |  |  |
| <b>Intubation</b>               | Date         | Time         | Indications:        |                         |              |                |  |  |  |
| <b>Extubation</b>               | Date         | Time         |                     |                         |              |                |  |  |  |
| Complications with Ventilation: |              |              |                     |                         |              |                |  |  |  |
| <b>Dialysis</b>                 |              | HD           | PD                  | <b>Number of cycles</b> |              | Complications: |  |  |  |
| <b>ICU care</b>                 |              | Duration     | d                   |                         |              |                |  |  |  |
| <b>Fasciotomy</b>               |              |              | <b>Wound toilet</b> |                         |              |                |  |  |  |
| <b>Wound infections</b>         |              |              |                     |                         |              |                |  |  |  |
| <b>Amputations</b>              |              |              |                     |                         |              |                |  |  |  |

1. Patient Status (outcome): Discharged alive/Death/transferred /LAMA/Missing
2. Status Date & time
3. If the patient dies, Cause of death according to post mortem
4. If patient transferred, Reason for transfer and hospital:

Data collected by:

Date:

Review date

L

Status

| Date & time                        |                                                                                   |              |               |           |           |           |           |
|------------------------------------|-----------------------------------------------------------------------------------|--------------|---------------|-----------|-----------|-----------|-----------|
| Time point from bite (T)           |                                                                                   | Onset time   | Resol. time   | TA        | T1        | T4        | T8        |
| <b>1. Neuro-muscular paralysis</b> |                                                                                   |              |               |           |           |           |           |
| 1.1.                               |  |              |               |           |           |           |           |
|                                    | Ptosis 0/I/II/III                                                                 |              |               |           |           |           |           |
| 1.2.                               | Diplopia with primary gaze                                                        |              |               |           |           |           |           |
| 1.3.                               | Diplopia with up-down gaze (+/-)                                                  |              |               |           |           |           |           |
| 1.4.                               | Diplopia with medial-lateral gaze (+/-)                                           |              |               |           |           |           |           |
| 1.5.                               | Eye movements (mark X for directions to which eye movements are weak)             |              |               |           |           |           |           |
| 1.6.                               | Blurred vision +/-                                                                |              |               |           |           |           |           |
| 1.7.                               | Pupil reaction (N-normal / D-fixed dilated)                                       |              |               |           |           |           |           |
| 1.8.                               | Bulbar weakness (Cough reflex) +/-                                                |              |               |           |           |           |           |
| 1.9.                               | Ability to swallow saliva +/-                                                     |              |               |           |           |           |           |
| 1.10.                              | Inability to talk (dysarthria) +/-                                                |              |               |           |           |           |           |
| 1.11.                              | Voice changes (High pitch/Low pitch /Absent)                                      |              |               |           |           |           |           |
| 1.12.                              | Palatal weakness (raising of the arches)+/-                                       |              |               |           |           |           |           |
| 1.13.                              | Neck flexion grade (1-5)                                                          |              |               |           |           |           |           |
| 1.14.                              | Neck extension grade (1-5)                                                        |              |               |           |           |           |           |
| 1.15.                              | Upper limb tone (Normal/High/Low)                                                 |              |               |           |           |           |           |
| 1.16.                              | Lower limb tone (Normal/High/Low)                                                 |              |               |           |           |           |           |
| 1.17.                              | Biceps power (1-5)                                                                |              |               |           |           |           |           |
| 1.18.                              | Quadriceps power (1-5)                                                            |              |               |           |           |           |           |
| 1.19.                              | Biceps jerk (Exaggerated/Diminished/Normal)                                       |              |               |           |           |           |           |
| 1.20.                              | Knee jerk (Exaggerated/Diminished/Normal)                                         |              |               |           |           |           |           |
| 1.21.                              | Peak Expiratory Flow rate                                                         |              |               |           |           |           |           |
| 1.22.                              | Tidal volume                                                                      |              |               |           |           |           |           |
|                                    | <b>Time point</b>                                                                 | <b>Onset</b> | <b>Resol.</b> | <b>TA</b> | <b>T1</b> | <b>T4</b> | <b>T8</b> |
| <b>2. Autonomic features</b>       |                                                                                   |              |               |           |           |           |           |
| 2.1.                               | Excessive sweating +/-                                                            |              |               |           |           |           |           |
| 2.2.                               | Tearing +/-                                                                       |              |               |           |           |           |           |
| 2.3.                               | Chemosis +/-                                                                      |              |               |           |           |           |           |
| 2.4.                               | Paralytic ileus (auscultate for bowel sounds) +/-                                 |              |               |           |           |           |           |
| 2.5.                               | Dairrhoea +/-                                                                     |              |               |           |           |           |           |
| 2.6.                               | Pulse rate                                                                        |              |               |           |           |           |           |
| 2.7.                               | BP (lying)                                                                        |              |               |           |           |           |           |
| 2.8.                               | BP (Sitting)                                                                      |              |               |           |           |           |           |
| 2.9.                               | Urinary incontinence +/-                                                          |              |               |           |           |           |           |
| 2.10.                              | Fecal incontinence +/-                                                            |              |               |           |           |           |           |
| <b>3. Miscellaneous</b>            |                                                                                   |              |               |           |           |           |           |
| 3.1                                | Paraesthesia / Numbness in the site of bite +/-                                   |              |               |           |           |           |           |
| 3.2                                | Reduced hearing (acc. Pt.) +/-                                                    |              |               |           |           |           |           |

|           |                                   |  |  |  |  |  |  |
|-----------|-----------------------------------|--|--|--|--|--|--|
| 3.3       | Facial muscle fasciculations +/-  |  |  |  |  |  |  |
| <b>4.</b> | <b>Myotoxicity</b>                |  |  |  |  |  |  |
| 4.1       | Muscle pain in bitten limb +/-    |  |  |  |  |  |  |
| 4.2       | Tender muscles in bitten limb +/- |  |  |  |  |  |  |
| 4.3       | Generalized muscle pain +/-       |  |  |  |  |  |  |
| 4.4       | Generalized muscle tenderness +/- |  |  |  |  |  |  |
| <b>5.</b> | <b>Central effects</b>            |  |  |  |  |  |  |
| 3.1       | GCS                               |  |  |  |  |  |  |
| 3.2       | Unilateral weakness (L/R)         |  |  |  |  |  |  |
| 3.3       | Quadriplegia                      |  |  |  |  |  |  |

**Muscle power grading:** No muscle contraction is visible – **0**; Muscle contraction is visible but there is no movement of the joint-**1**; Active joint movement is possible with gravity eliminated – **3**; The muscle group can overcome gravity and move against some resistance from the examiner -**4** ; Full and normal power against resistance - **5**.
